# Supplementary material for: Reactive microglia partially envelop viable neurons in prion diseases
Source: JCI journal article supplement (doi:10.1172/jci181169), 2024-10-03

Figure 9B

-PK 3D17  
Normal  
64dpi  
78dpi  
92dpi  
106dpi  
122dpi  
146dpi  
Term  
N old

+PK 3D17  
Normal  
64dpi  
78dpi  
92dpi  
106dpi  
122dpi  
146dpi  
Term  
N old

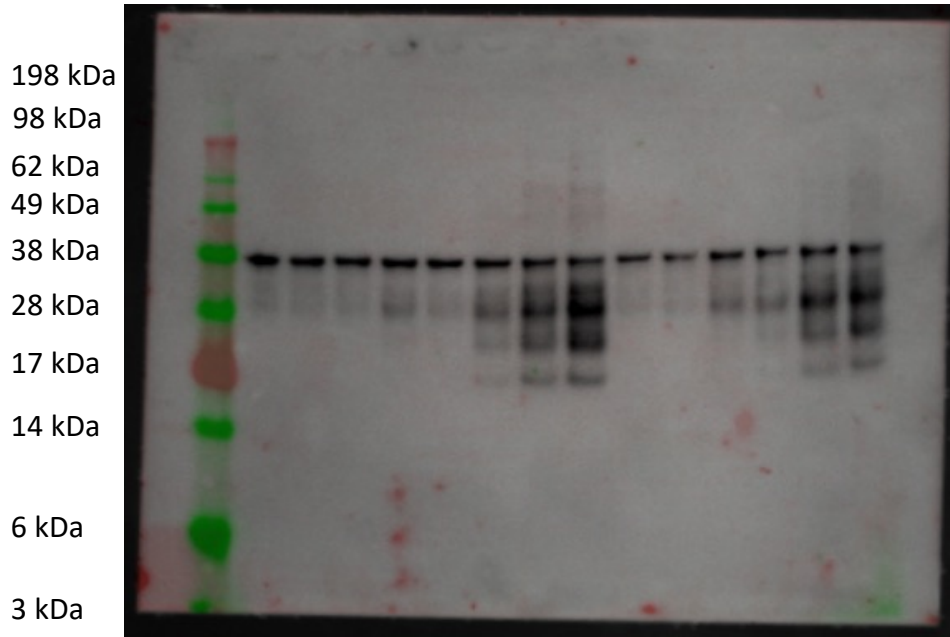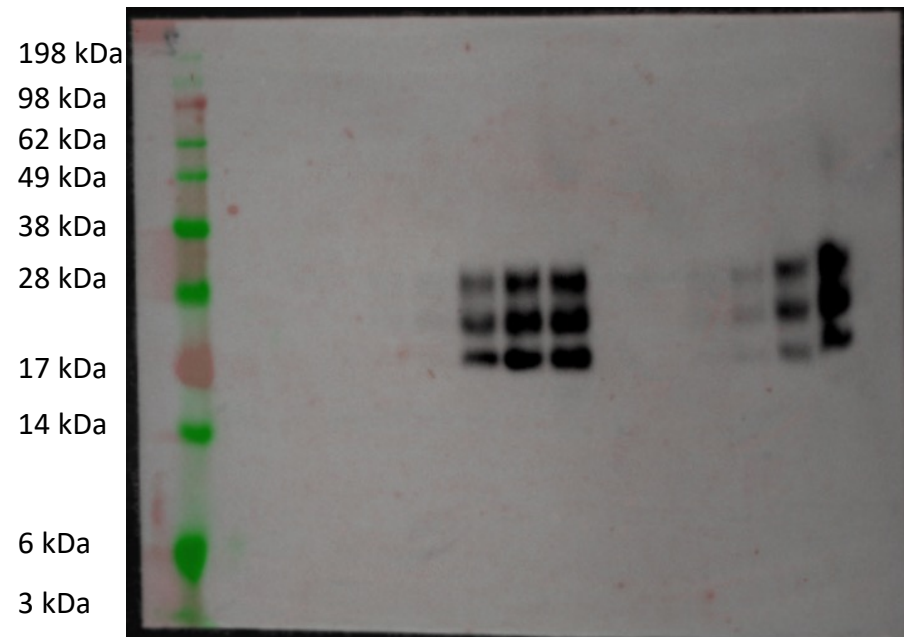

Figure 9B

tubb3  
Normal  
64dpi  
78dpi  
92dpi  
106dpi  
122dpi  
146dpi  
Term  
N old

198 kDa  
98 kDa  
62 kDa  
49 kDa  
38 kDa  
28 kDa  
17 kDa  
14 kDa  
6 kDa  
3 kDa

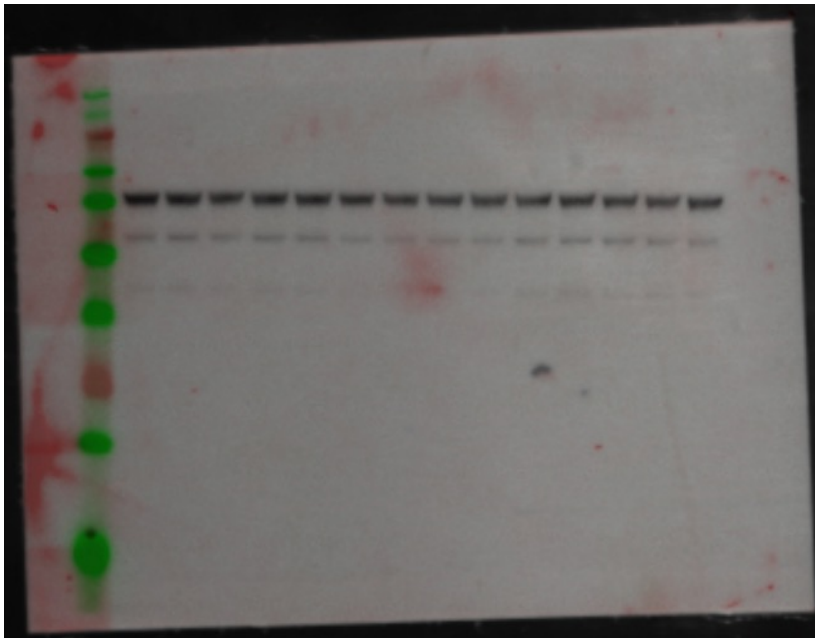

cd11b  
Normal  
64dpi  
78dpi  
92dpi  
106dpi  
122dpi  
146dpi  
Term  
N old

198 kDa  
98 kDa  
62 kDa  
49 kDa  
38 kDa  
28 kDa  
17 kDa  
14 kDa  
6 kDa  
3 kDa

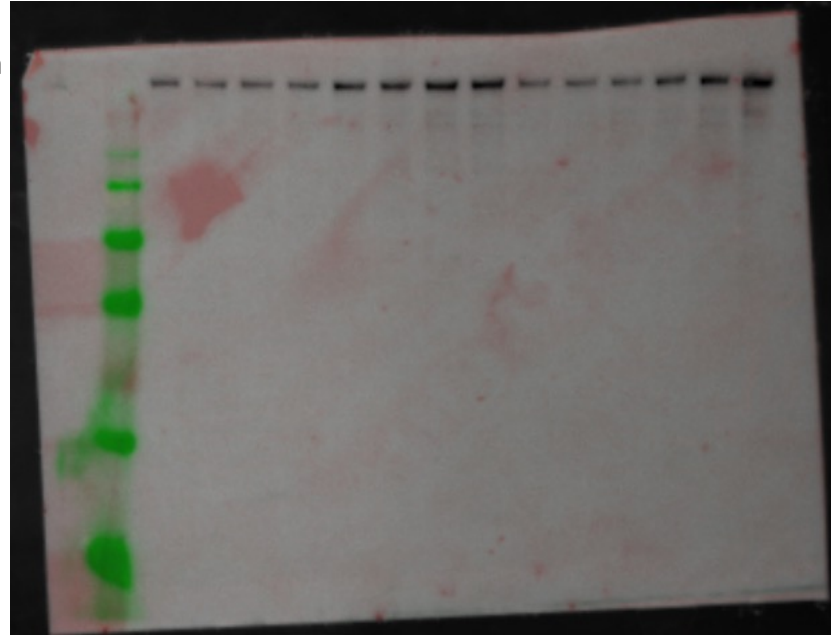

Figure 9B

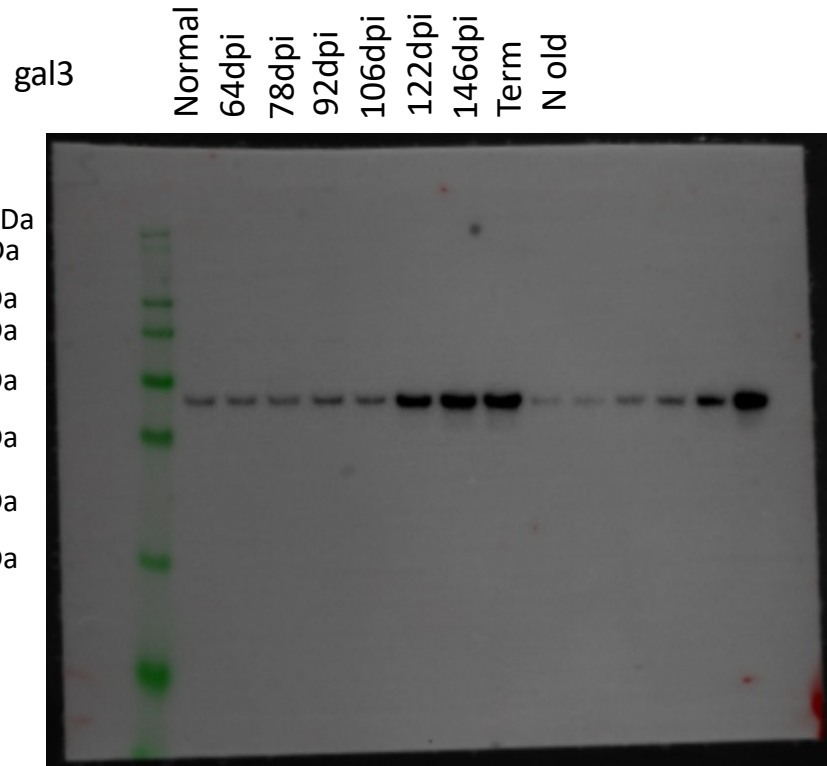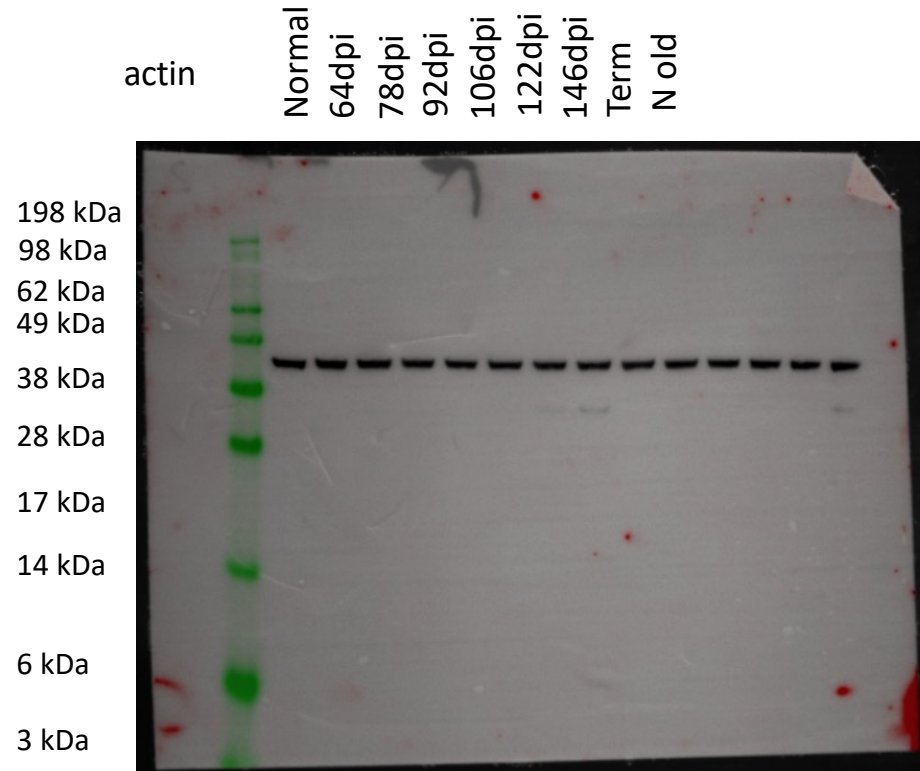

Figure 11C

CD11b

wt wt wt ko ko ko

198 kDa  
98 kDa  
62 kDa  
49 kDa  
38 kDa  
28 kDa  
17 kDa  
14 kDa  
6 kDa  
3 kDa

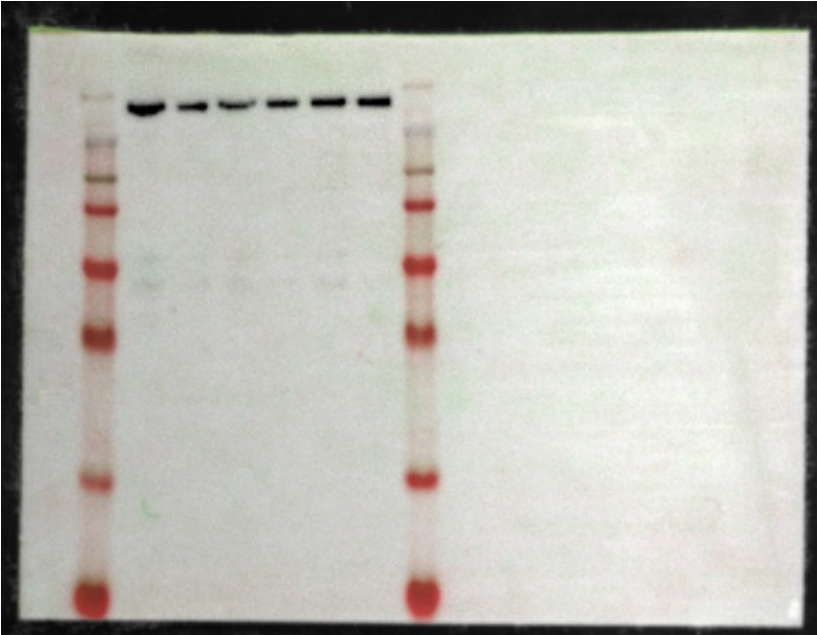

tubb3

wt wt wt ko ko ko

198 kDa  
98 kDa  
62 kDa  
49 kDa  
38 kDa  
28 kDa  
17 kDa  
14 kDa  
6 kDa  
3 kDa

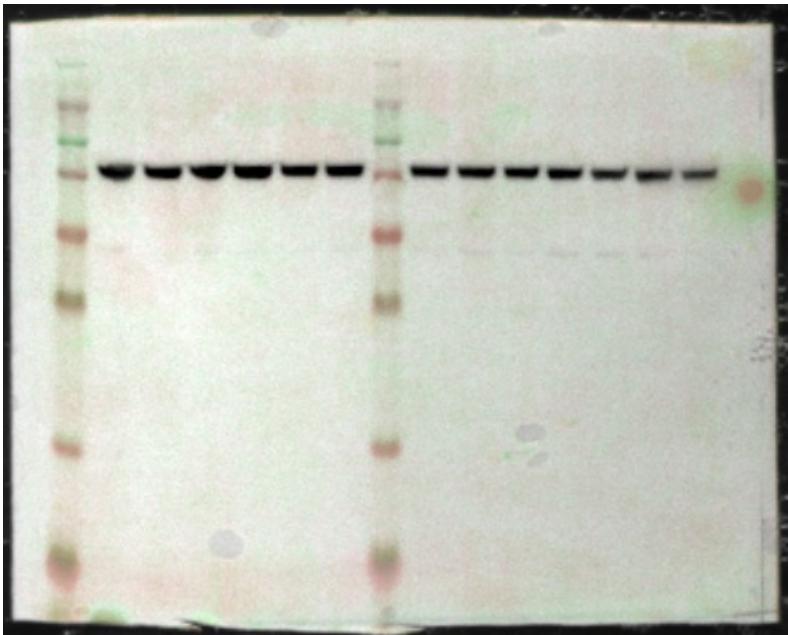

Figure 11C

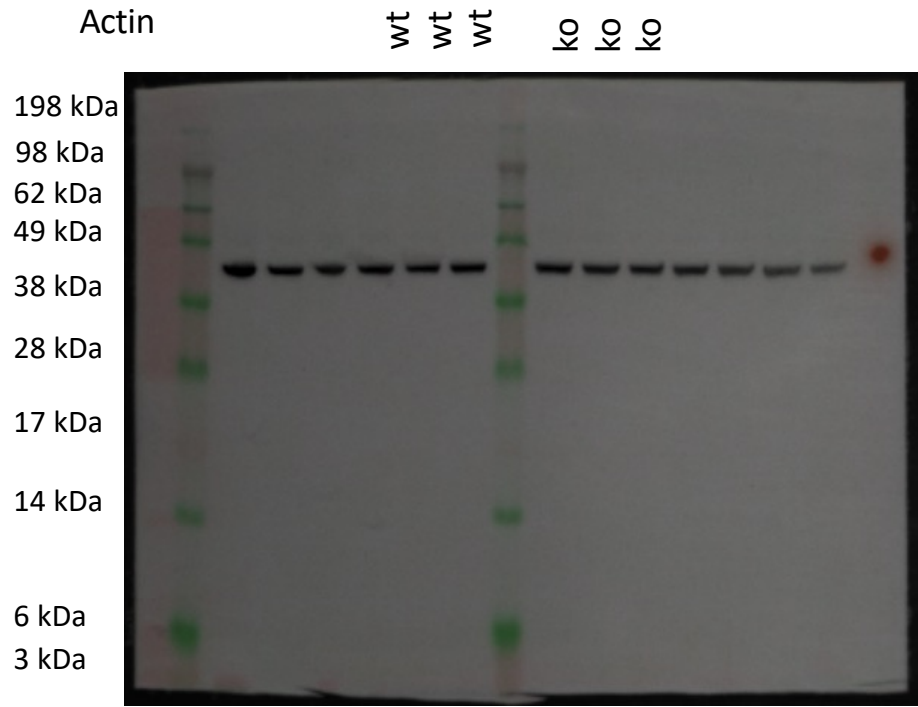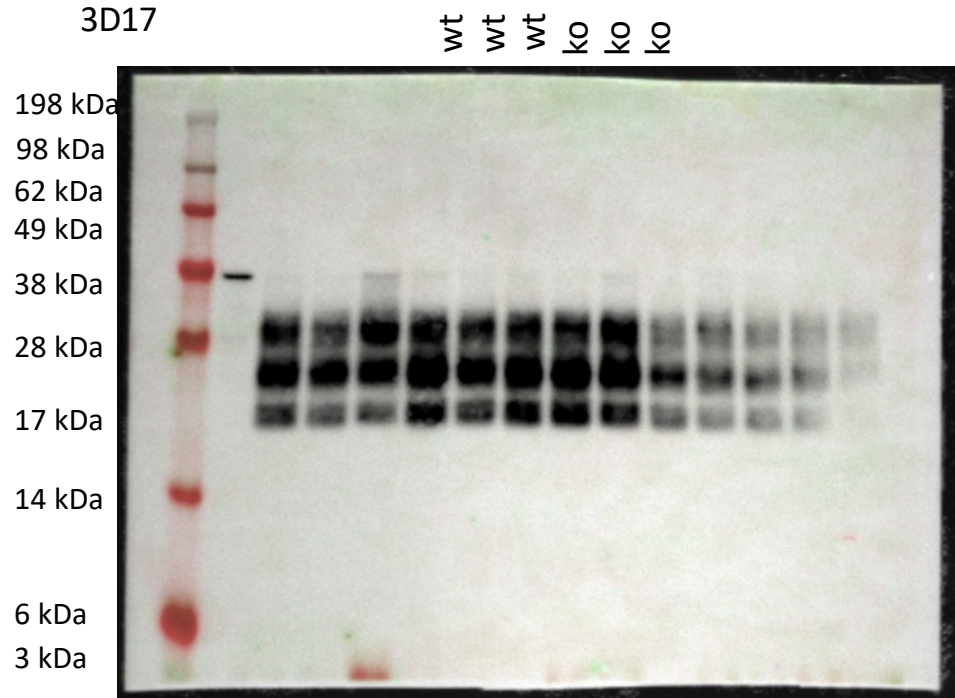

Figure 11C

Gal3

wt ko wt ko wt ko

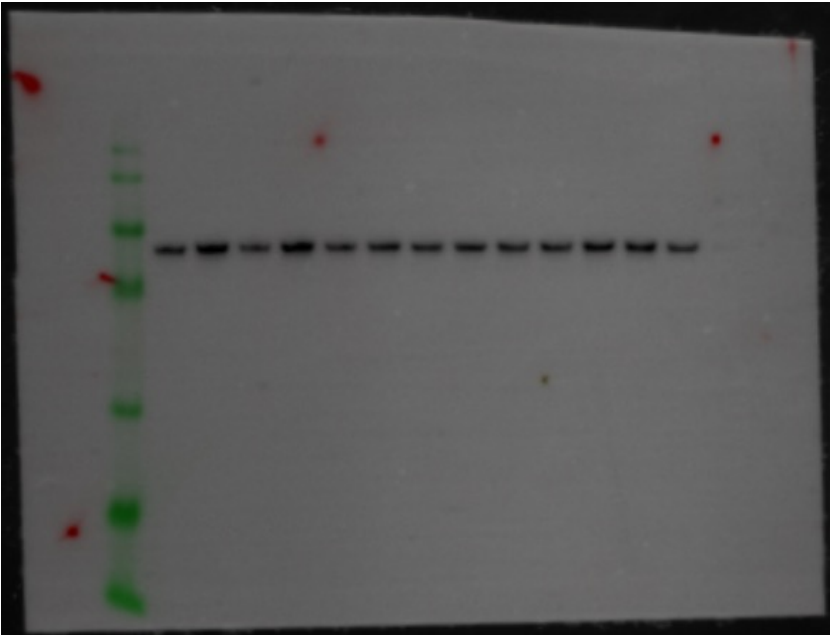

Actin

wt ko wt ko wt ko

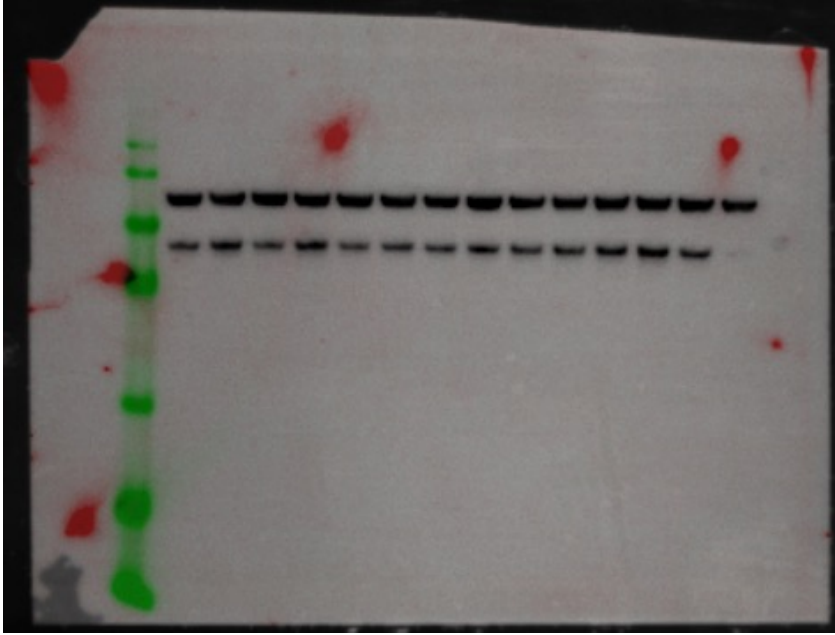

Supplement: sd2 [file 2]
